# Supplementary material
Source: MDPI journal article supplement (https://www.mdpi.com/2673-401X/4/1/8)
Supplement: s1 [file s1]

## **Looking for a safe bridge: synthesis of P3HT-bridge-TBO block-copolymers and their performance in perovskite solar cells**

Aleksandra N. Zhivchikova <sup>1,2</sup>, Irina V. Klimovich <sup>3</sup>, Maxim E. Sideltsev <sup>1</sup>, Aly Elakshar <sup>2</sup>, Artur T. Kapasharov <sup>1</sup>, Alexander V. Akkuratov <sup>1</sup>, Albert G. Nasibulin <sup>2</sup>, Keith J. Stevenson <sup>4</sup> and Marina M. Tepliakova <sup>2,\*</sup>

1 Federal Research Center of Problems of Chemical Physics and Medicinal Chemistry of Russian Academy of Sciences, Academician Semenov Avenue 1, 142432 Chernogolovka, Russia

2 Skolkovo Institute of Science and Technology, Bolshoy Boulevard 30, bld. 1, 121205, Moscow, Russia

3 ChemRAR, 2a-1, Rabochaya St. Khimki, 141401 Moscow, Russia

4 Moscow State University, Department of Chemistry, 1 Leninskiye Gory, 119991 Moscow, Russia

\* Correspondence: [marina.tepliakova@skoltech.ru](mailto:marina.tepliakova@skoltech.ru)

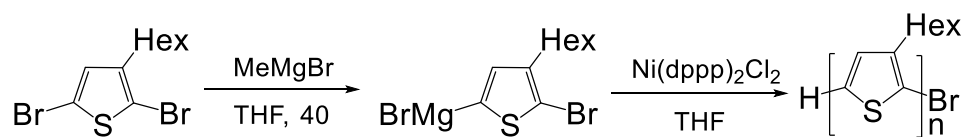

**Scheme S1. Synthesis of P3HT-Br.**

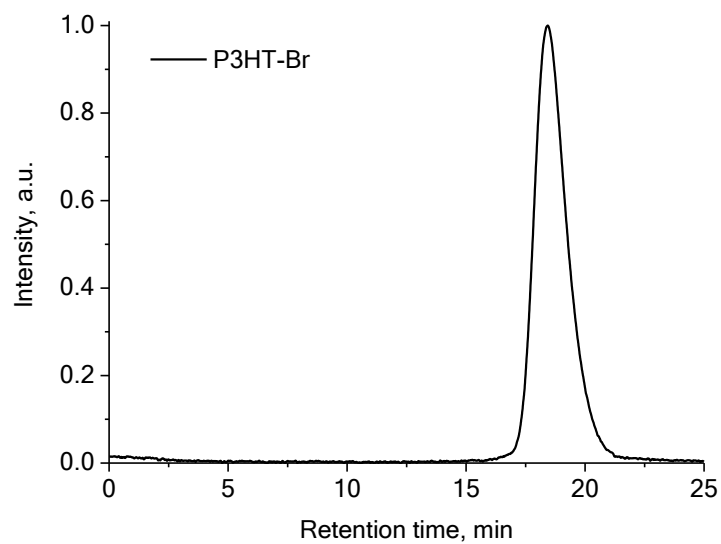

**Figure S1. Gel-permeation chromatography of P3HT-Br**

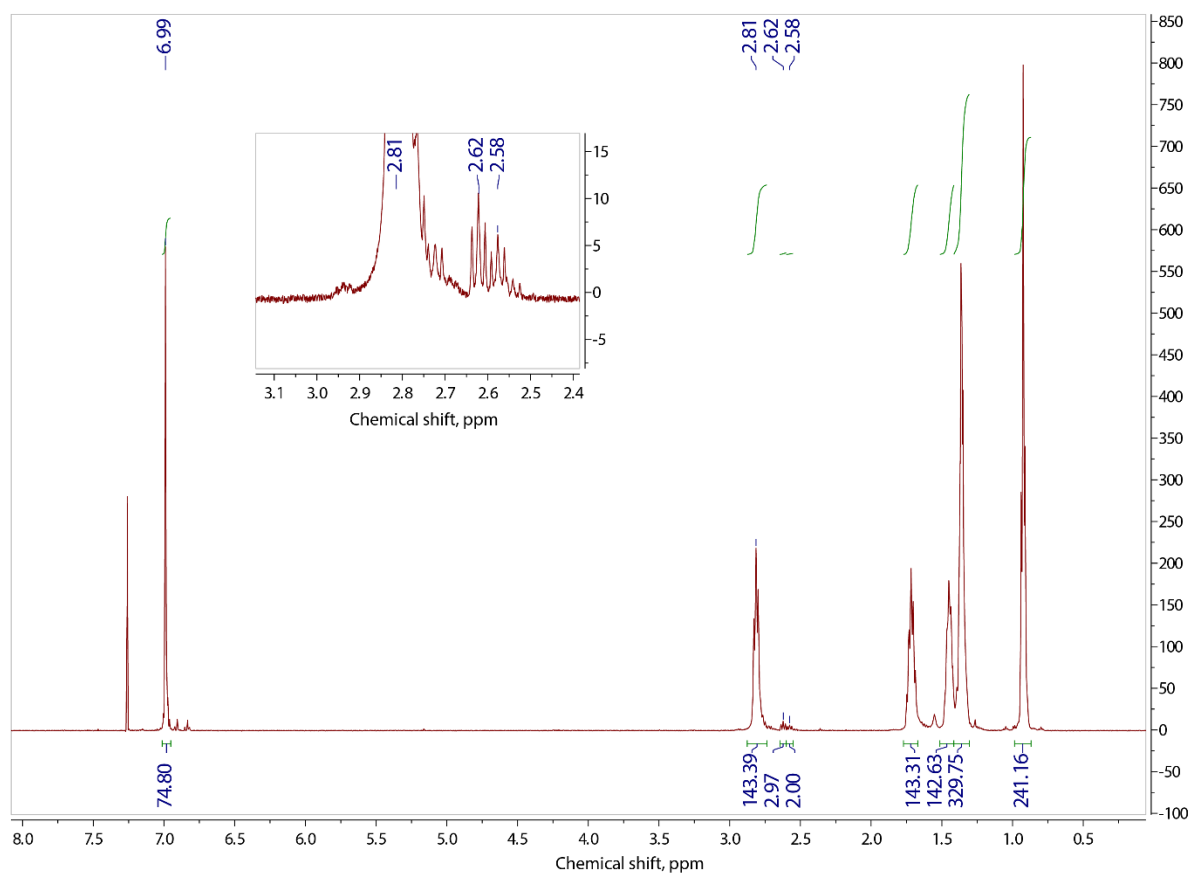

**Figure S2. 1H NMR of P3HT-Br**

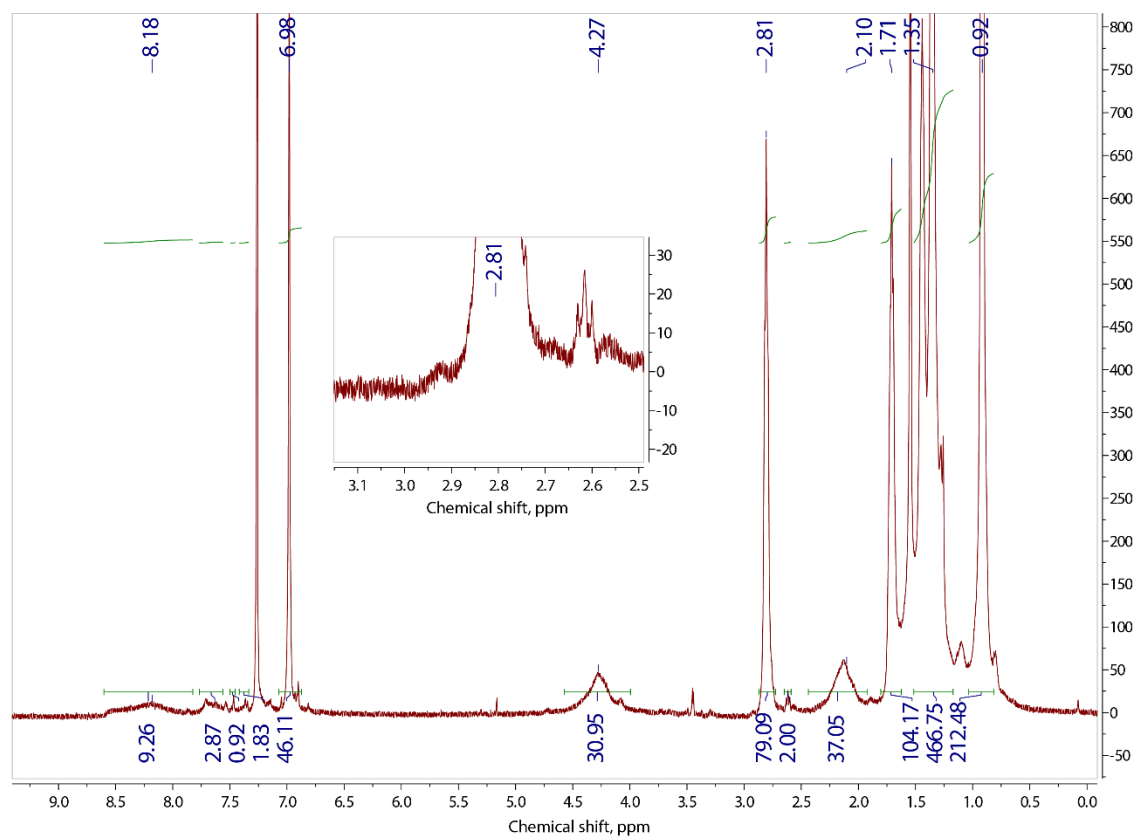

**Figure S3. NMR of P3HT-TF-TBO**

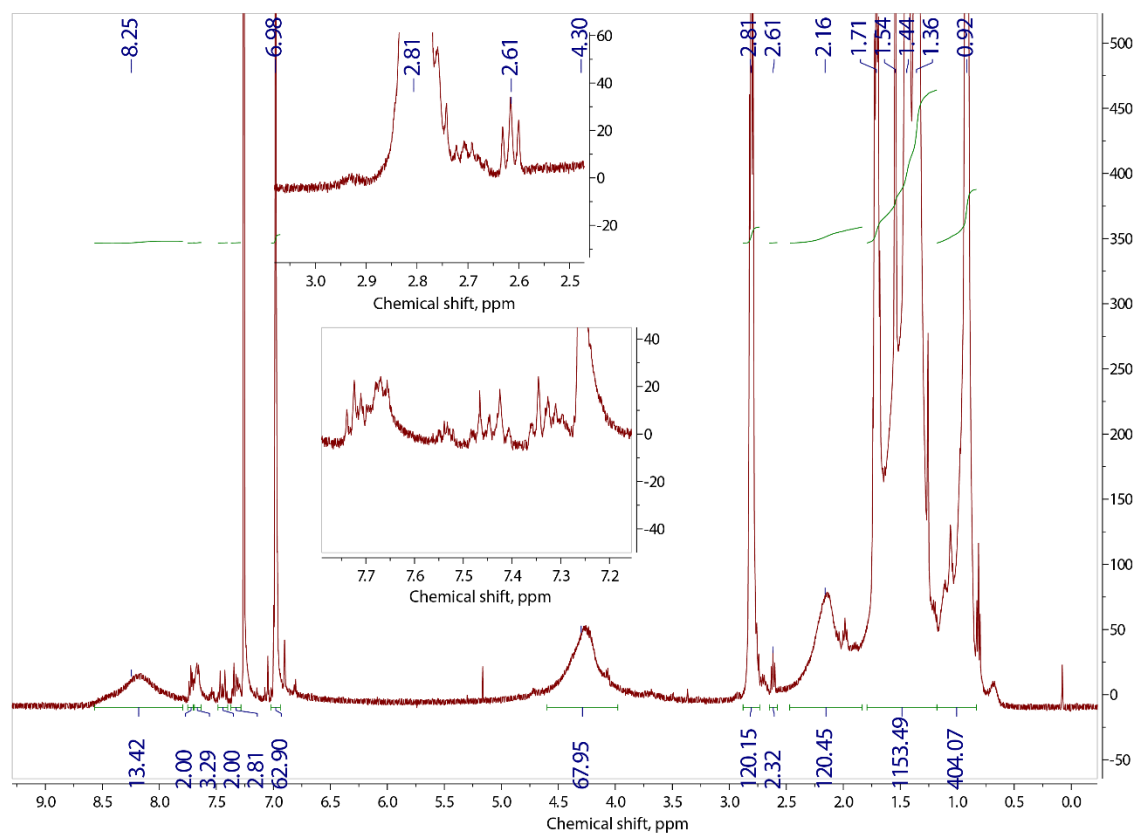

**Figure S4. NMR of P3HT-FF-TBO**

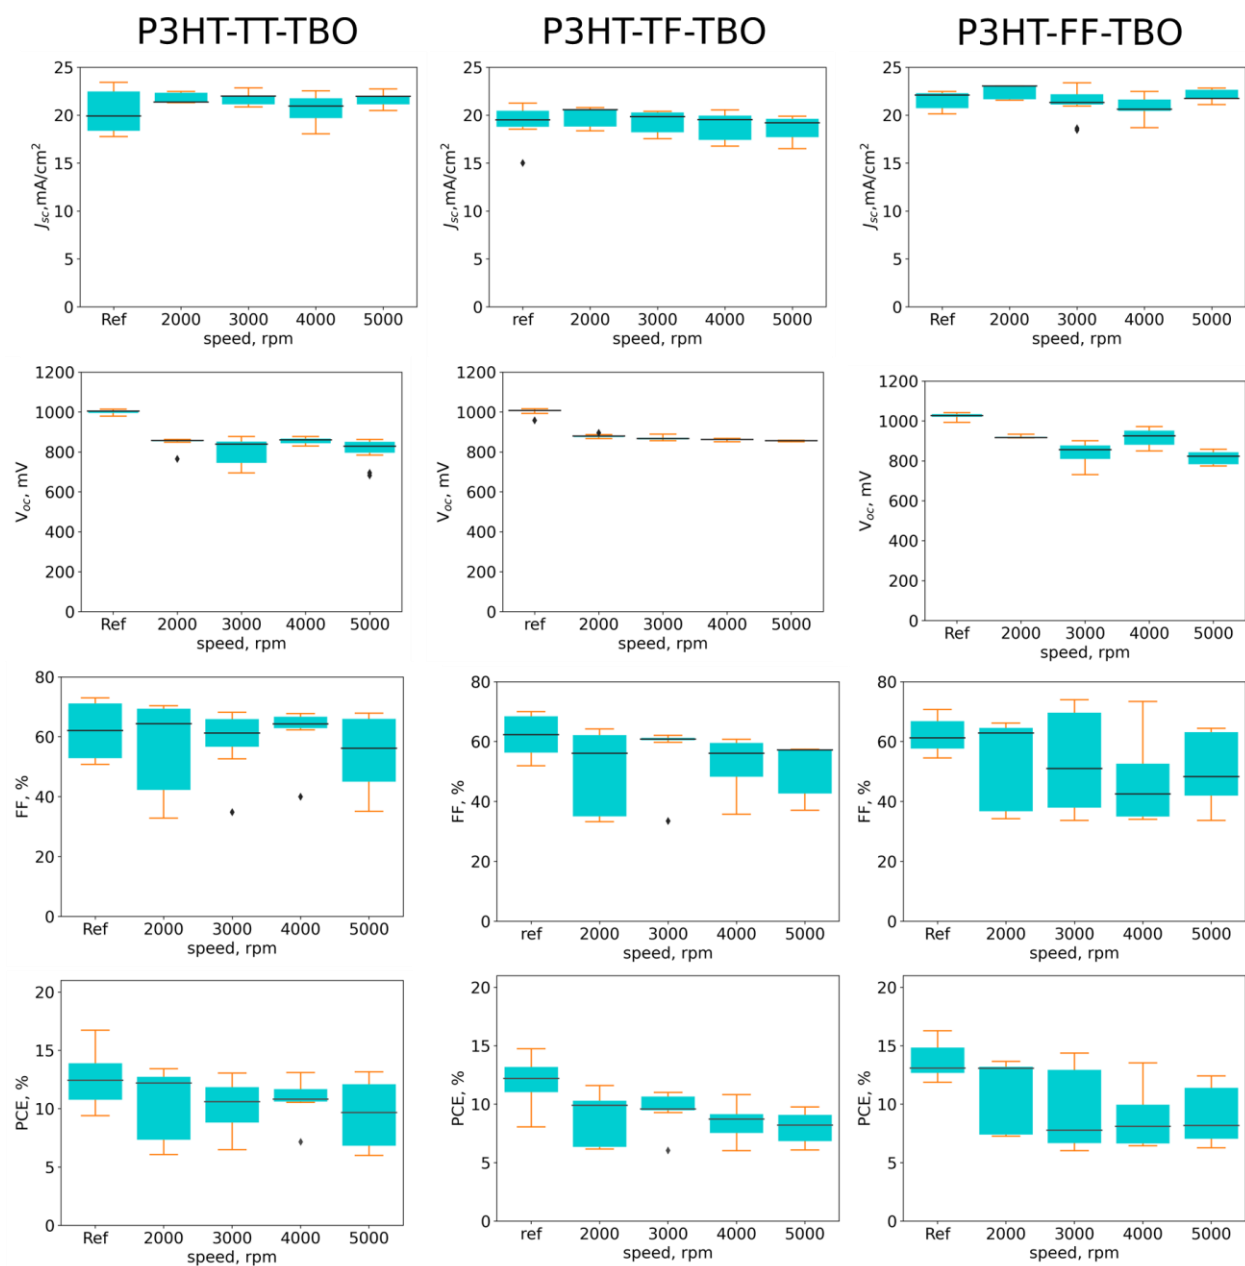

**Figure S5. Optimization experiment. Current-voltage characteristics of devices with various deposition conditions applied for block-copolymers.**

**Table S1. Charge carrier lifetime extracted from time-resolved photoluminescence measurements.**

| Sample                          | A1   | t1, ns | A2   | t2, ns |
|---------------------------------|------|--------|------|--------|
| Bare MAPbI <sub>3</sub>         | 452  | 63     | 3379 | 321    |
| MAPbI <sub>3</sub> /P3HT-TT-TBO | 1255 | 17     | 973  | 61     |
| MAPbI <sub>3</sub> /P3HT-TF-TBO | 2193 | 17     | 1917 | 39     |
| MAPbI <sub>3</sub> /P3HT-FF-TBO | 1808 | 18     | 623  | 46     |

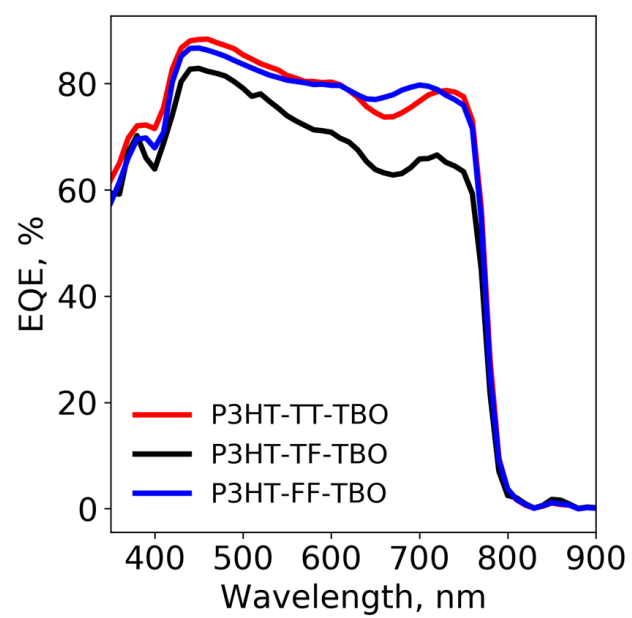

**Figure S6. EQE of PSCs with various BCPs.**



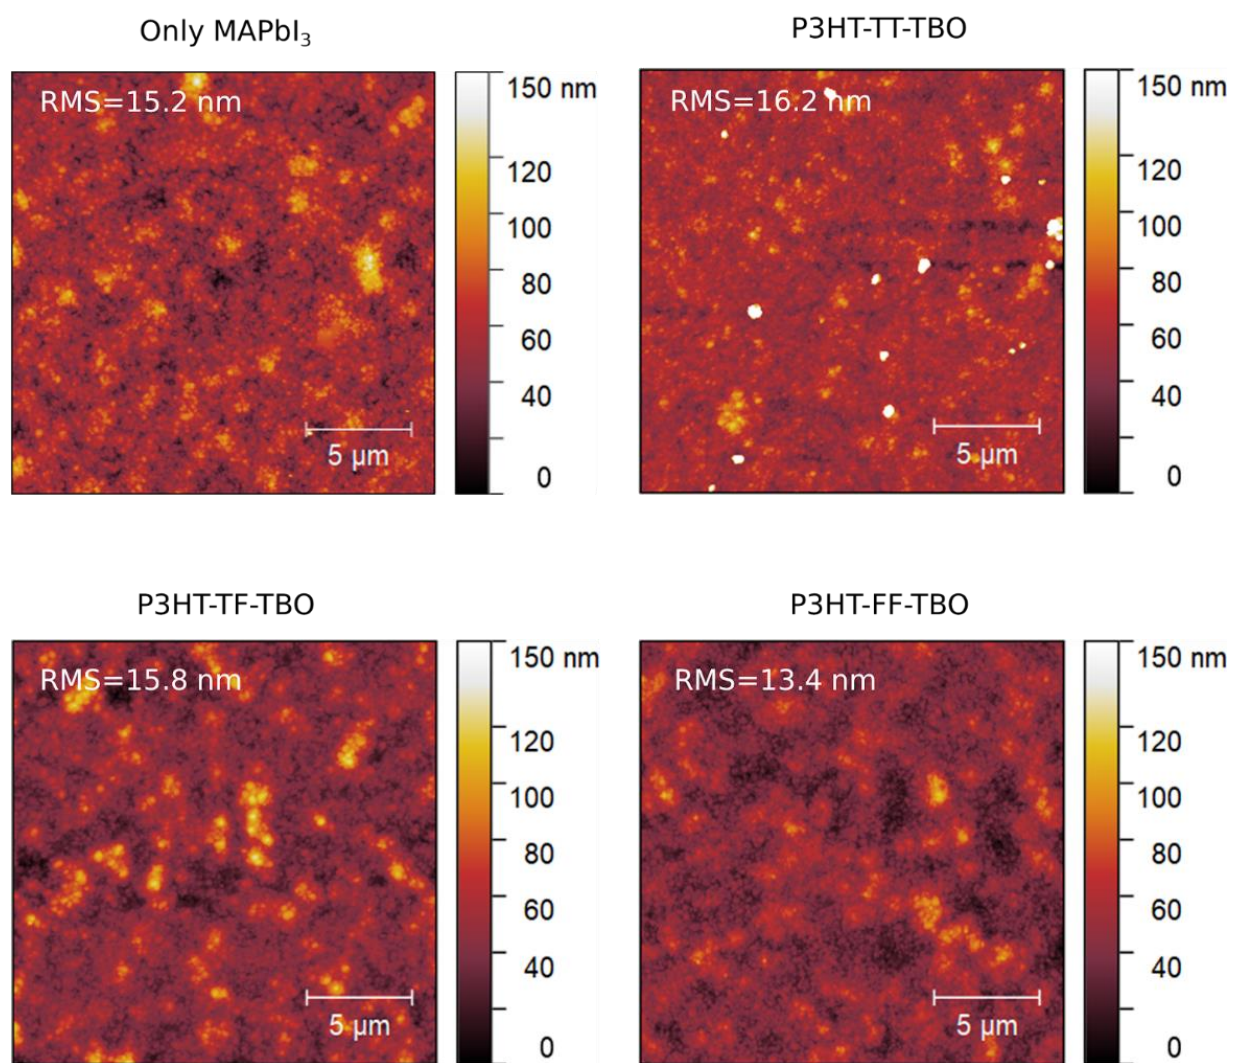

Figure S7. AFM of the samples with configuration perovskite/HTM.

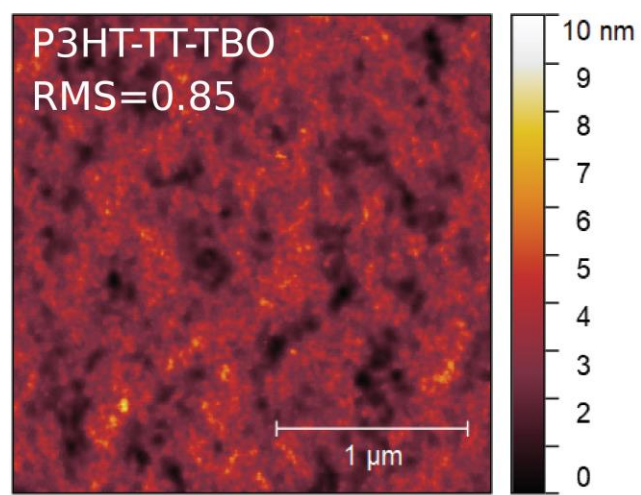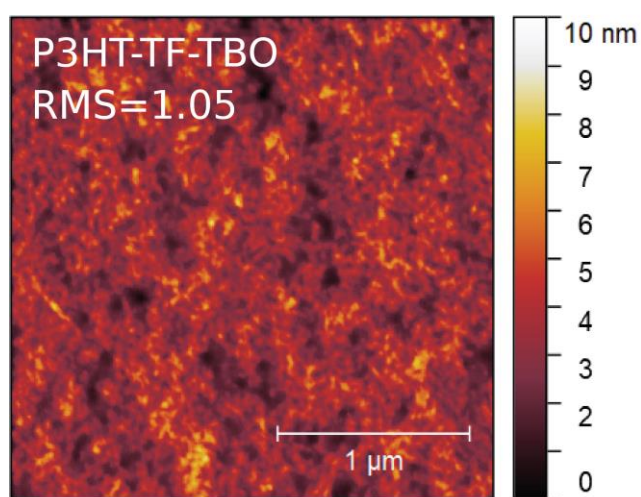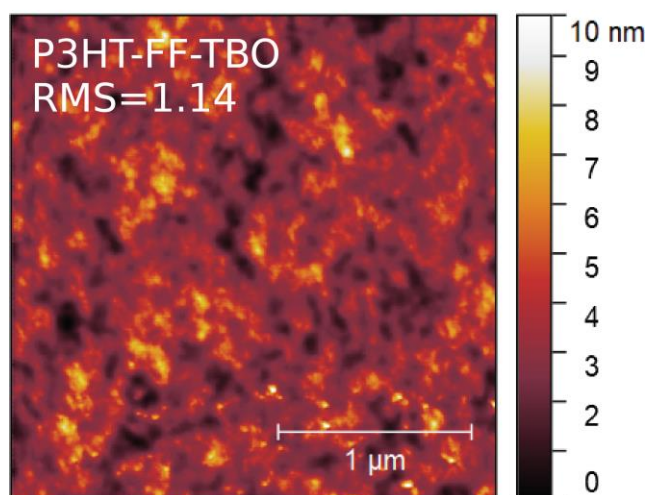

Figure S8. AFM of bare BCPs

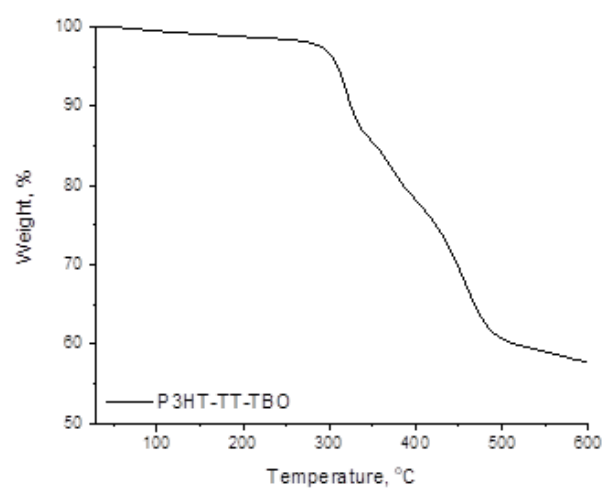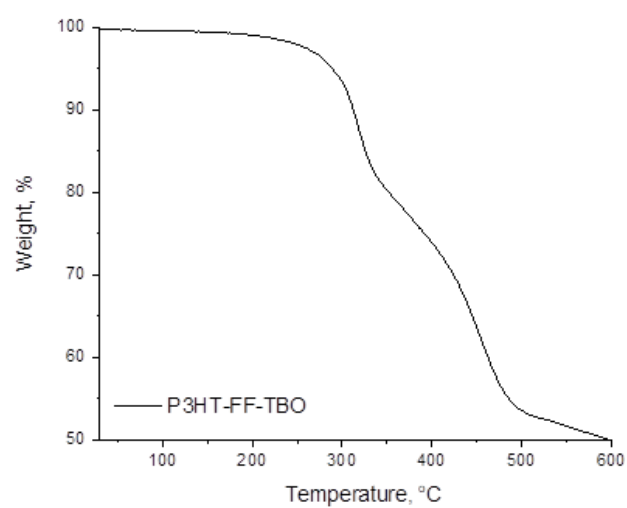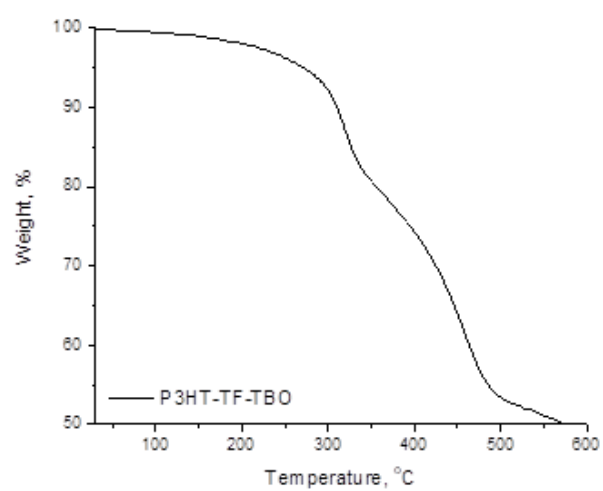

**Figure S9. TGA of block copolymers**

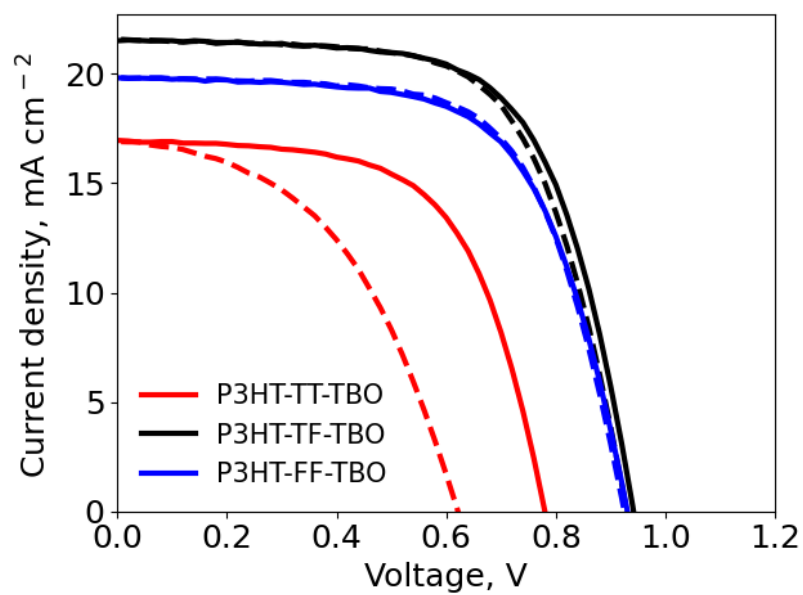

**Figure S10.** J-V characteristics of degraded (1000 h under continuous illumination) PSCs with P3HT-bridge-TBO block copolymers as HTMs.

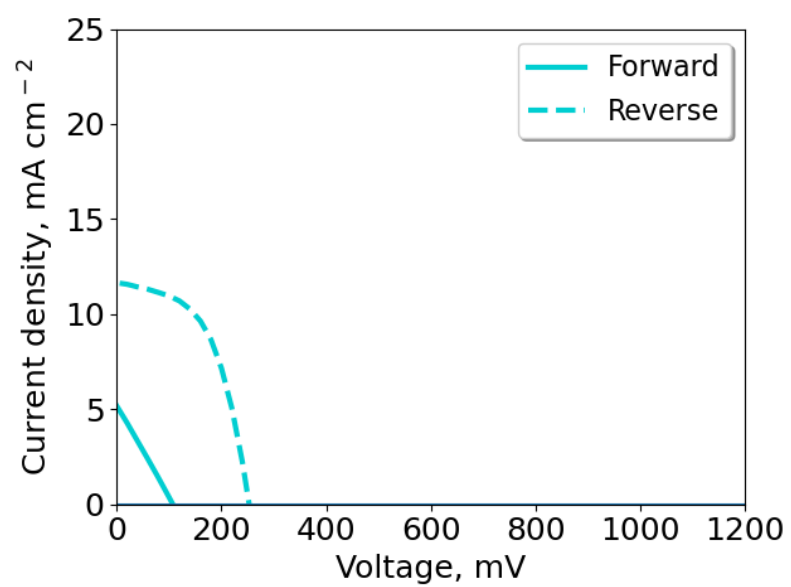

**Figure S11.** Current-voltage characteristics for device with MoO<sub>x</sub> as HTL

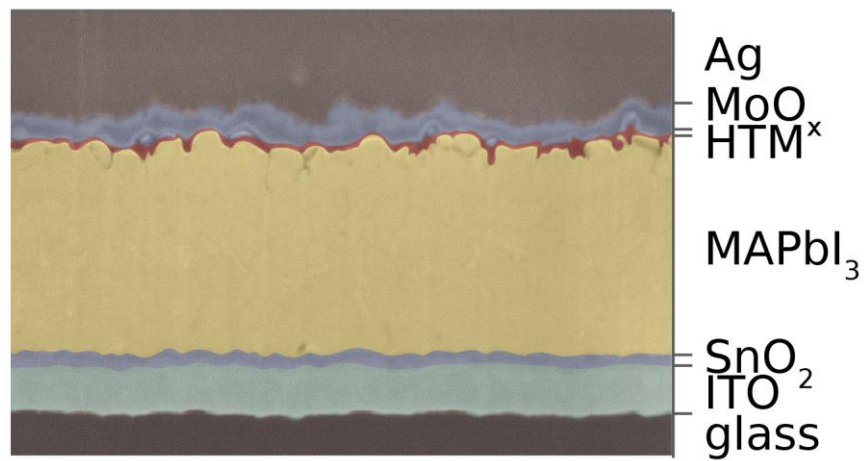

**Figure S12.** Cross-sectional SEM of PSC with PTAA measured on Tescan Solaris with Ga<sup>+</sup> beam.
